# Supplementary material for: A new approach for measuring temperature inside turtle eggs
Source: Oxford University Press journal article supplement (doi:10.1242/jeb.188698), 2018-01-01
Supplement: jeb188698supp.pdf [file jeb188698supp.pdf]

**Supplemental Material:**

**Table S1.** (A) Repeated measures ANOVA and (B) corresponding Post hoc comparison of temperature of the air in incubator chamber, temperature inside of the egg, and temperature of the sand directly surrounding it.

**A**

| Source of variation              | <i>df</i> | SS       | MS      | <i>F</i> | $\leq P$ |
|----------------------------------|-----------|----------|---------|----------|----------|
| Inside Outside                   | 2         | 1723.270 | 861.635 | 127.222  | 0.001    |
| Chamber                          | 1         | 529.984  | 529.984 | 78.253   | 0.001    |
| Trial                            | 3         | 30.093   | 10.031  | 1.481    | 0.257    |
| Inside Outside * Chamber         | 2         | 1.472    | 0.736   | 0.109    | 0.898    |
| Inside Outside * Trial           | 6         | 5.110    | 0.852   | 0.126    | 0.991    |
| Chamber * Trial                  | 3         | 31.149   | 10.383  | 1.533    | 0.244    |
| Inside Outside * Chamber * Trial | 6         | 9.603    | 1.601   | 0.236    | 0.958    |
| Error                            | 16        | 108.363  | 6.773   |          |          |

**B**

| In/ Out | In/ Out | Mean Difference | Std. Error | Sig.  | Lower Bound | Upper Bound |
|---------|---------|-----------------|------------|-------|-------------|-------------|
| Air     | In      | 3.277           | 0.225      | 0.000 | 2.696       | 3.859       |
|         | Out     | 3.286           | 0.225      | 0.000 | 2.705       | 3.868       |
| In      | Air     | -3.277          | 0.223      | 0.000 | -3.859      | -2.696      |
|         | Out     | 0.009           | 0.184      | 0.999 | -0.466      | 0.484       |
| Out     | Air     | -3.286          | 0.225      | 0.000 | -3.868      | -2.705      |
|         | In      | -0.009          | 0.184      | 0.999 | -0.484      | 0.466       |

**Table S2.** (A) Repeated measures ANOVA analysis of temperature inside of the egg by moisture treatment and (B) corresponding Post hoc comparison of temperature inside of the egg in high moisture treatment and intermediate moisture treatment using Tukey HSD test.

| <b>A</b>                   |  |           |           |           |           |           |
|----------------------------|--|-----------|-----------|-----------|-----------|-----------|
| <b>Source of variation</b> |  | <b>df</b> | <b>SS</b> | <b>MS</b> | <b>F</b>  | <b>≤P</b> |
| Chamber                    |  | 1         | 529.980   | 529.984   | 13458.918 | 0.001     |
| Trial                      |  | 3         | 30.093    | 10.31     | 254.733   | 0.001     |
| Wet Dry                    |  | 2         | 1810.646  | 905.323   | 22990.615 | 0.001     |
| Chamber * Trial            |  | 3         | 31.149    | 10.383    | 263.675   | 0.001     |
| Chamber * Wet Dry          |  | 2         | 18.435    | 9.217     | 234.077   | 0.001     |
| Trial * Wet Dry            |  | 6         | 5.513     | 0.919     | 23.335    | 0.001     |
| Chamber * Trial * Wet Dry  |  | 6         | 12.593    | 2.099     | 53.302    | 0.001     |
| Error                      |  | 16        | 0.630     | 0.390     |           |           |

  

| <b>B</b>       |                |                        |                   |             |                    |                    |
|----------------|----------------|------------------------|-------------------|-------------|--------------------|--------------------|
| <b>Wet/Dry</b> | <b>Wet/Dry</b> | <b>Mean Difference</b> | <b>Std. Error</b> | <b>Sig.</b> | <b>Lower Bound</b> | <b>Upper Bound</b> |
| Air            | Dry            | 2.951                  | 0.017             | 0.000       | 2.907              | 2.996              |
|                | Wet            | 3.612                  | 0.017             | 0.000       | 3.568              | 3.657              |
| Dry            | Air            | -2.951                 | 0.017             | 0.000       | -2.996             | -2.906             |
|                | Wet            | 0.661                  | 0.014             | 0.000       | 0.624              | 0.697              |
| Wet            | Air            | -3.612                 | 0.017             | 0.000       | -3.657             | -3.568             |
|                | Dry            | -0.661                 | 0.014             | 0.000       | -0.697             | -0.625             |
